# Supplementary material for: Cyanide bridged coordination polymer nanoflakes thermally derived Ni3C and fcc-Ni nanoparticles for electrocatalysts
Source: Royal Society of Chemistry journal article supplement (doi:10.1039/c7nj03311g), 2017-01-01
Supplement: c7nj03311g1.pdf [file c7nj03311g1.pdf]

## **Cyanide Bridged Coordination Polymer Nanoflakes Thermally Derived Ni<sub>3</sub>C and fcc-Ni Nanoparticles for Electrocatalysts**

Mohamed B. Zakaria,<sup>1,2\*</sup> El-Zeiny M. Ebeid,<sup>2</sup> Mohamed M. Abdel-Galeil,<sup>2</sup> and  
Toyohiro Chikyow<sup>1,3\*</sup>

1 International Research Center for Materials Nanoarchitectonics (MANA), National Institute for Materials Science (NIMS), 1-1 Namiki, Tsukuba, Ibaraki 305-0044, Japan.

2 Department of Chemistry, Faculty of Science, Tanta University, Tanta, Gharbeya 31527, Egypt.

3 Materials Data & Integrated System (MaDIS), National Institute for Materials Science (NIMS), 1-2-1 Sengen, Tsukuba, Ibaraki 305-0047, Japan.

E-mails: [Chikyo.toyohiro@nims.go.jp](mailto:Chikyo.toyohiro@nims.go.jp)

[mohamed.barakat@nims.go.jp](mailto:mohamed.barakat@nims.go.jp)

[mohamed.hegazy3@science.tanta.edu.eg](mailto:mohamed.hegazy3@science.tanta.edu.eg)

**Figure S1**

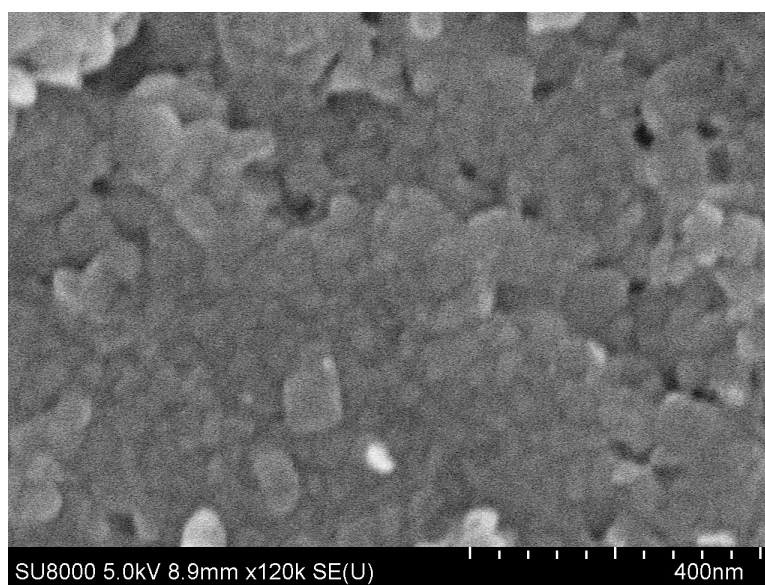

**Figure S1** SEM of the as-prepared NiCNNi CP in absence of TSCD.

**Figure S2**

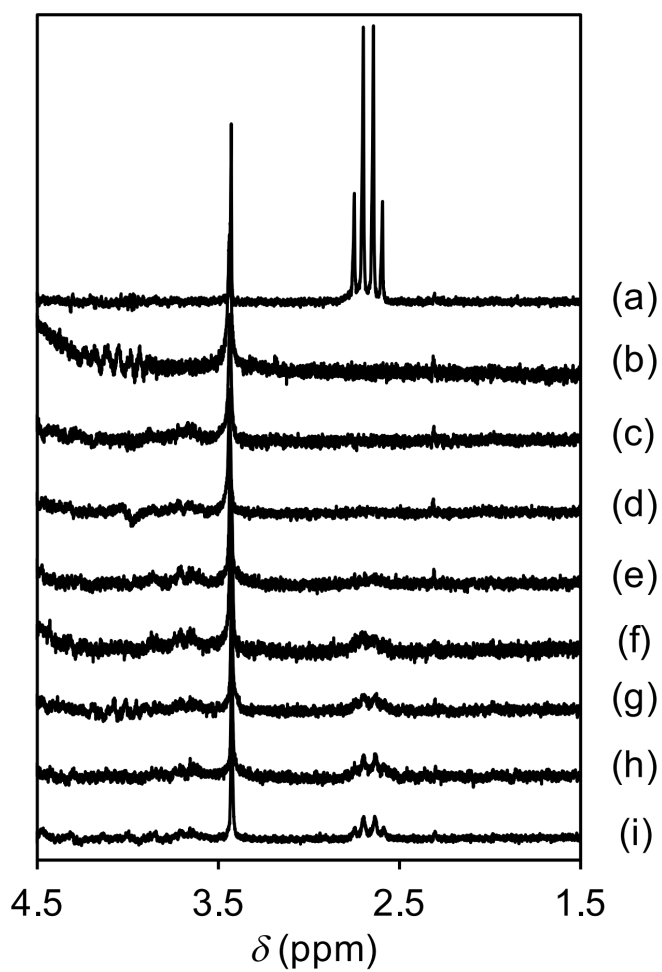

**Figure S2**  $^1\text{H}$  NMR spectra of TSCD in absence (a) and presence (b) of  $\text{NiCl}_2 \cdot 6\text{H}_2\text{O}$ . Time course  $^1\text{H}$  NMR spectra of Ni-TSCD complex measured after addition of  $\text{K}_2[\text{Ni}(\text{CN})_4] \cdot x\text{H}_2\text{O}$  at 10 min (c), 30 min (d), 1 h (e), 3 h (f), 6 h (g), 12 h (h), and 24 h (i).

**Figure S3**

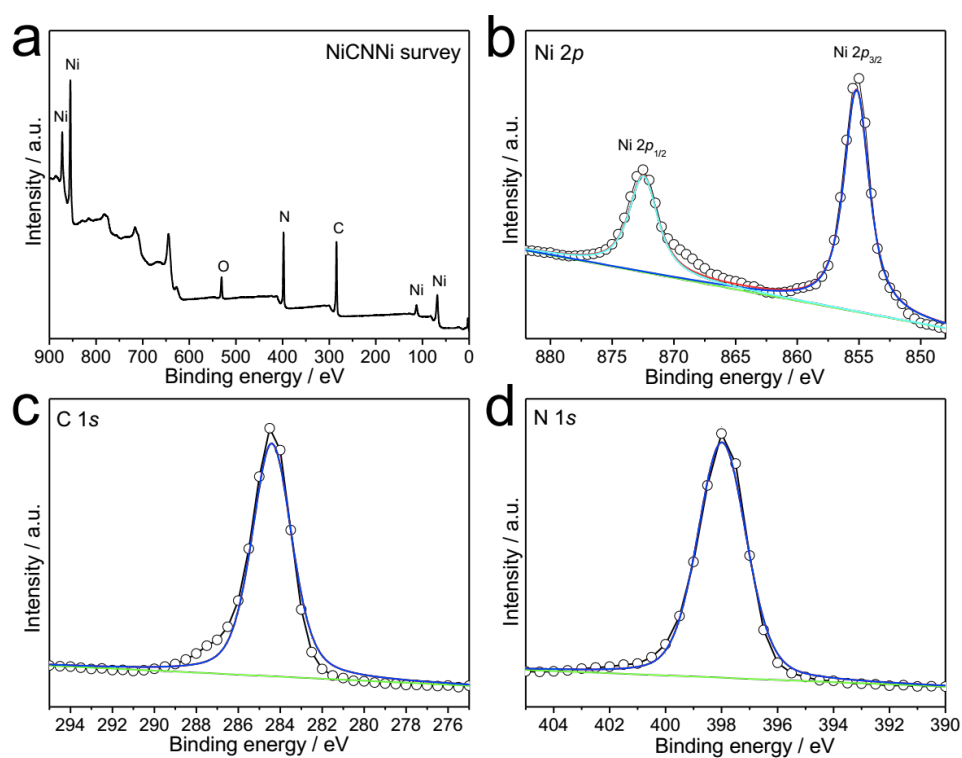

**Figure S3** Wide-range XPS survey (a) and high resolution XPS spectra of Ni 2p (b), C 1s (c), and N 1s (d) of NiCNNi CP nanoflakes.

**Figure S4**

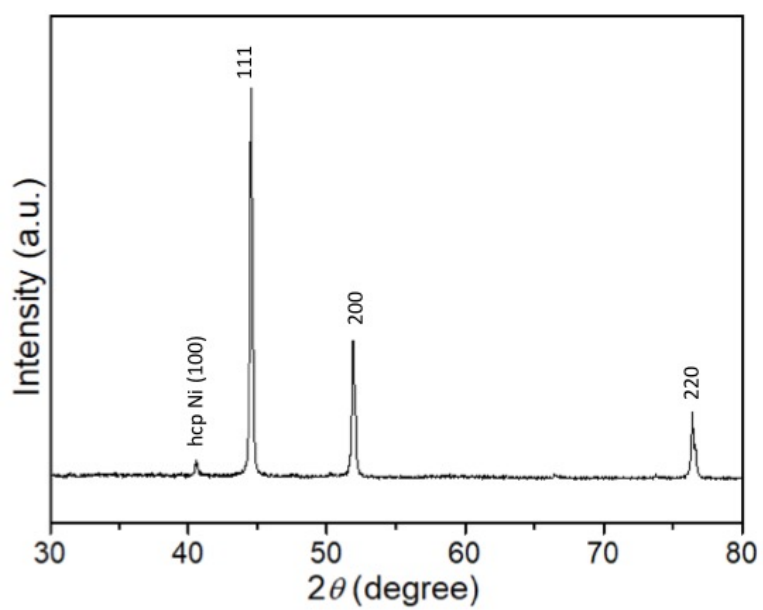

**Figure S4** Wide-angle XRD patterns of fcc-Ni nanoparticles obtained at 650 °C.

**Figure S5**

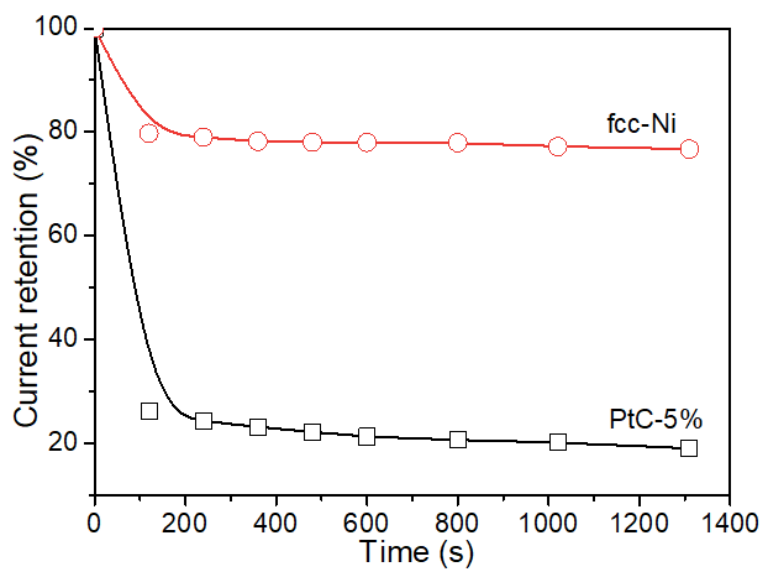

**Figure S5** Current retention plot during chronoamperometric measurements at a constant potential (-0.5 V vs. Ag/AgCl) for thermally derived fcc-Ni and commercially available Pt/C-5% catalysts.
